# Supplementary material for: Predicting Functionally Informative Mutations inEscherichia coliBamA Using Evolutionary Covariance Analysis
Source: Oxford University Press journal article supplement (doi:10.1534/genetics.113.155861), 2013-08-10
Supplement: genetics.113.155861-2.pdf [file genetics.113.155861-2.pdf]

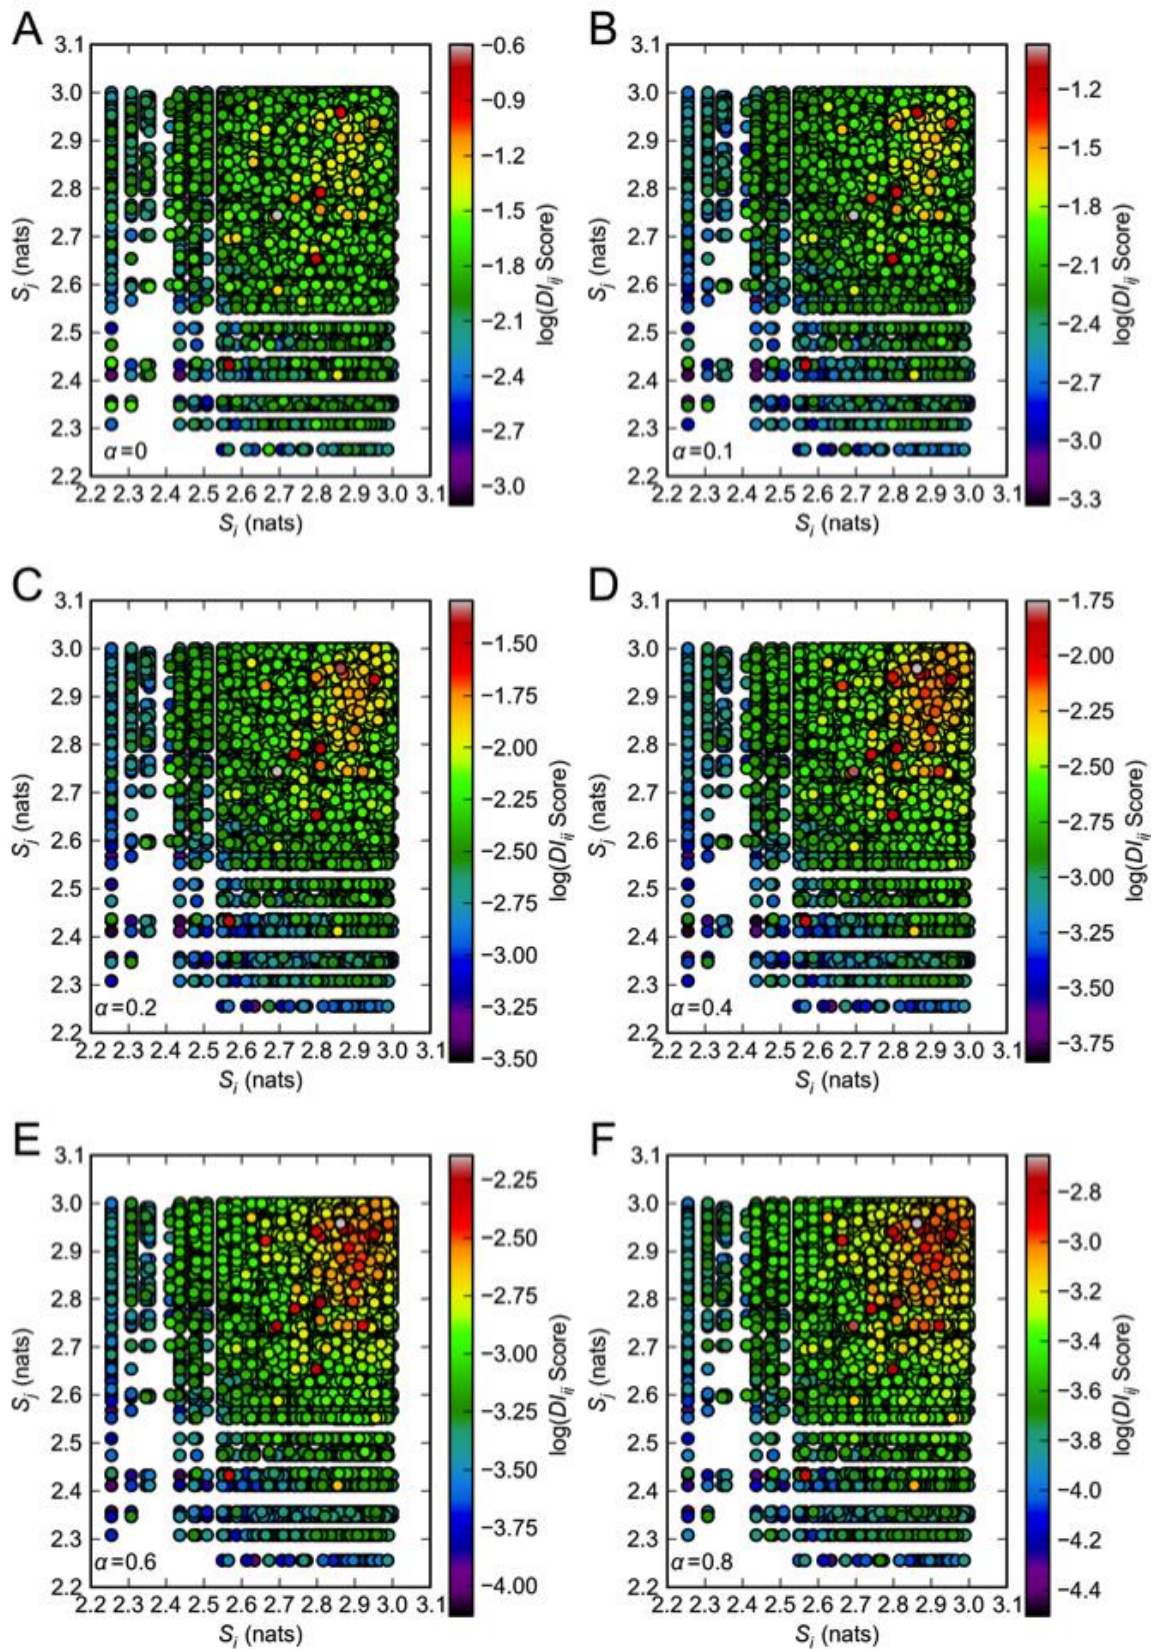

**Figure S1** Effect of sequence informational entropy  $S_i$ ,  $S_j$  on pair  $DI_{ij}$  score.  $\log(DI_{ij} \text{ Score})$  is plotted against sequence informational entropies  $S_i$  and  $S_j$  for all FhaC pairs shown in Figure 1C.
