# Supplementary material for: Predicting Functionally Informative Mutations inEscherichia coliBamA Using Evolutionary Covariance Analysis
Source: Oxford University Press journal article supplement (doi:10.1534/genetics.113.155861), 2013-08-10
Supplement: genetics.113.155861-6.pdf [file genetics.113.155861-6.pdf]

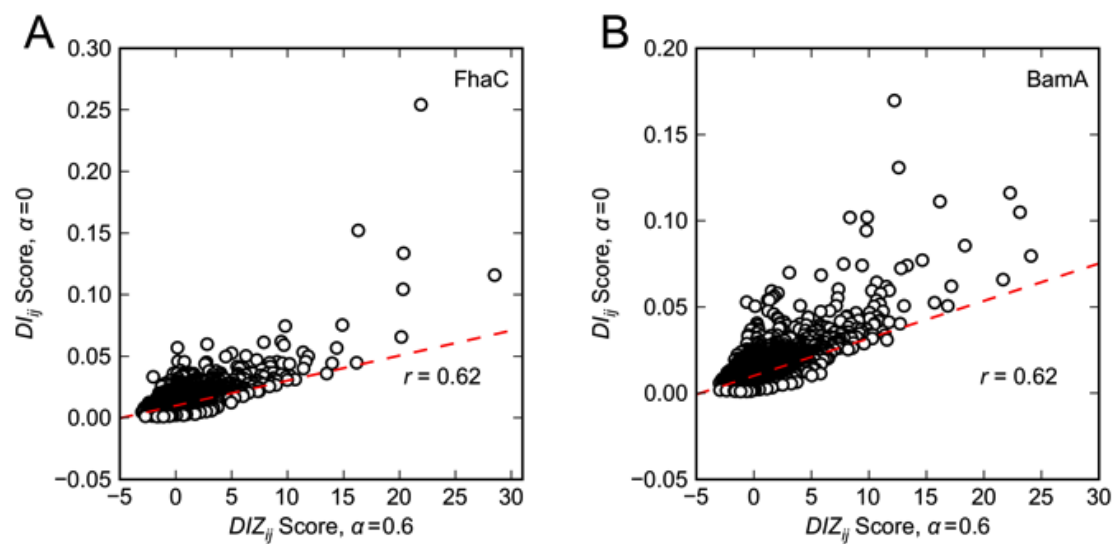

**Figure S3** Correlation of  $DCA_{DI_{ij}}^{\alpha=0}$  and  $DCA_{DIZ_{ij}}^{\alpha=0.6}$  scores. DCA was performed as in Figures 2E,F. Least squares regression line (red) is shown along with correlation coefficient  $r$ .
